# Supplementary material
Source: PubMed Central journal article supplement (PMC3715854)
Supplement: emboj2013110s3.pdf [file emboj2013110s3.pdf]

**Table 2. Merkel cell quantification**

| Figure | Genotype          | Age | n (sections) | Marker    | Total MCs | Total (mm) | cell/mm |
|--------|-------------------|-----|--------------|-----------|-----------|------------|---------|
| 1A     | WT                | P0  | 13           | K18       | 318       | 127        | 2.5     |
|        | Ezh1/2 2KO        | P0  | 16           | K18       | 1285      | 150        | 8.6     |
|        | WT                | P90 | 8            | K18       | 2         | 84         | 0.0     |
|        | Ezh1/2 2KO        | P90 | 11           | K18       | 95        | 83         | 1.1     |
|        | WT                | P0  | 6            | K20       | 94        | 72         | 1.3     |
|        | Ezh1/2 2KO        | P0  | 7            | K20       | 298       | 52         | 5.7     |
|        | WT                | P90 | 7            | K20       | 5         | 81         | 0.1     |
|        | Ezh1/2 2KO        | P90 | 5            | K20       | 33        | 39         | 0.8     |
| 1G     | WT                | P0  | 5            | TEM       | 37        | 9          | 4.1     |
|        | Ezh1/2 2KO        | P0  | 5            | TEM       | 120       | 8.7        | 13.8    |
| 3E     | WT                | E15 | 10           | Sox2/K20  | 0         | 109        | 0.0     |
|        |                   |     |              | Sox2      | 19        |            | 0.2     |
|        | WT                | E17 | 8            | Sox2/K20  | 99        | 97         | 1.0     |
|        |                   |     |              | Sox2      | 151       |            | 1.6     |
|        | WT                | P0  | 7            | Sox2/K20  | 74        | 68         | 1.1     |
| 3F     |                   |     |              | Sox2      | 26        |            | 0.4     |
|        | WT                | E15 | 8            | Sox2      | 14        | 90         | 0.2     |
|        | Ezh1/2 2KO        | E15 | 8            | Sox2      | 45        | 83         | 0.5     |
| 4C     | WT                | P2  | 5            | K18       | 156       | 82         | 1.9     |
|        | Sox2cKO           | P2  | 6            | K18       | 16        | 80         | 0.2     |
| 4D     | WT                | P2  | 6            | K20       | 112       | 73         | 1.5     |
|        | Sox2cKO           | P2  | 6            | K20       | 5         | 80         | 0.1     |
| 4E     | WT                | P2  | 5            | TEM       | 37        | 9          | 4.1     |
|        | Sox2cKO           | P2  | 5            | TEM       | 3         | 9.5        | 0.3     |
| 4F     | WT                | P22 | 8            | K20       | 5         | 99         | 0.1     |
|        | Sox2cKO           | P22 | 8            | K20       | 2         | 95         | 0.0     |
| 5G     | WT (Atoh1-GFP)    | P0  | 9            | Atoh1-GFP | 226       | 103        | 2.2     |
|        | Sox2cKO/Atoh1-GFP | P0  | 11           | Atoh1-GFP | 144       | 86         | 1.7     |
|        | WT (Atoh1-GFP)    | P35 | 8            | Atoh1-GFP | 16        | 103        | 0.2     |
|        | Sox2cKO/Atoh1-GFP | P35 | 8            | Atoh1-GFP | 0         | 92         | 0.0     |
| 6A     | WT                | P0  | 5            | TEM       | 37        | 9          | 4.1     |
|        | 3KO               | P0  | 5            | TEM       | 13        | 5.8        | 2.2     |
| 6C     | Ezh1/2 2KO        | P0  | 7            | K20       | 119       | 24         | 5.0     |
|        | 3KO               | P0  | 4            | K20       | 5         | 53         | 0.1     |
|        | Ezh1/2 2KO        | P0  | 8            | Rab3C     | 128       | 56         | 2.3     |
|        | 3KO               | P0  | 5            | Rab3C     | 10        | 64         | 0.2     |

**Supplemental Figures**

|     |                    |     |             |                  |        |      |      |
|-----|--------------------|-----|-------------|------------------|--------|------|------|
| S1F | WT (WF)            | P0  | 22          | K20              | 144    | 4.4  | 32.7 |
|     | Ezh1/2 2KO (WF)    | P0  | 8           | K20              | 76     | 2.1  | 36.2 |
|     | WT (W-IFE)         | P0  | 7           | K20              | 68     | 7.2  | 9.4  |
|     | Ezh1/2 2KO (W-IFE) | P0  | 5           | K20              | 81     | 5.4  | 15.0 |
|     | WT (Paw)           | P0  | 28          | K20              | 63     | 13.3 | 4.7  |
|     | Ezh1/2 2KO (Paw)   | P0  | 21          | K20              | 137    | 13.3 | 10.3 |
| S1G | WT                 | E15 | 6           | Guard hairs      | 156 HF | 86   | 1.8  |
|     | Ezh1/2 2KO         | E15 | 6           | Guard hairs      | 185 HF | 87   | 2.1  |
| S2I | WT                 | P0  | 18 clusters | # of K18/cluster | 458    | 81   | 5.7  |
|     | Ezh1/2 2KO         | P0  | 28 clusters | # of K18/cluster | 455    | 84   | 5.4  |
|     | WT                 | P0  | 11          | #cluster/mm      | 71     | 133  | 0.5  |
|     | Ezh1/2 2KO         | P0  | 6           | #cluster/mm      | 278    | 110  | 2.5  |
| S4N | WT (WF)            | P0  | 22          | K20              | 144    | 4.4  | 32.7 |
|     | Sox2cKO (WF)       | P0  | 4           | K20              | 0      | 1.3  | 0.0  |
|     | WT (W-IFE)         | P0  | 7           | K20              | 68     | 7.2  | 9.4  |
|     | Sox2cKO (W-IFE)    | P0  | 4           | K20              | 0      | 2.5  | 0.0  |
|     | WT (Paw)           | P0  | 28          | K20              | 63     | 13.3 | 4.7  |
|     | Sox2cKO (Paw)      | P0  | 5           | K20              | 0      | 3.3  | 0.0  |
| S5A | WT (Atoh1-GFP)     | P0  | 6           | K20              | 94     | 67   | 1.4  |
| S5E | Sox2cKO/Atoh1-GFP  | P0  | 5           | K20              | 0      | 44   | 0.0  |
|     | WT                 | P1  | 7           | Isl1             | 121    | 70   | 1.7  |
|     | Sox2cKO            | P1  | 8           | Isl1             | 10     | 106  | 0.1  |
| S6J | WT                 | P0  | 11          | K18              | 200    | 38   | 5.3  |
| S6O | Ezh1/2 2KO         | P0  | 9           | K18              | 180    | 76   | 2.4  |
|     | WT (WF)            | P0  | 22          | K20              | 144    | 4.4  | 32.7 |
|     | 3KO (WF)           | P0  | 8           | K20              | 0      | 3.1  | 0.0  |
|     | WT (W-IFE)         | P0  | 7           | K20              | 68     | 7.2  | 9.4  |
|     | 3KO (W-IFE)        | P0  | 4           | K20              | 0      | 2.7  | 0.0  |
|     | WT (Paw)           | P0  | 28          | K20              | 63     | 13.3 | 4.7  |
|     | 3KO (Paw)          | P0  | 10          | K20              | 0      | 4.8  | 0.0  |

Markers were evaluated by IF or TEM. WF: Whisker Follicle; W-IFE: Whisker Interfollicular epidermis; HF: Hair follicle; 3KO: Ezh1/2 2KO Sox2cKO.
